# Supplementary material
Source: Springer Nature journal article supplement (https://www.springermedizin.de/resource/supplementary/12889_2008_1547_MOESM2_ESM.pdf/9503400)

A

## Test Use Among Men

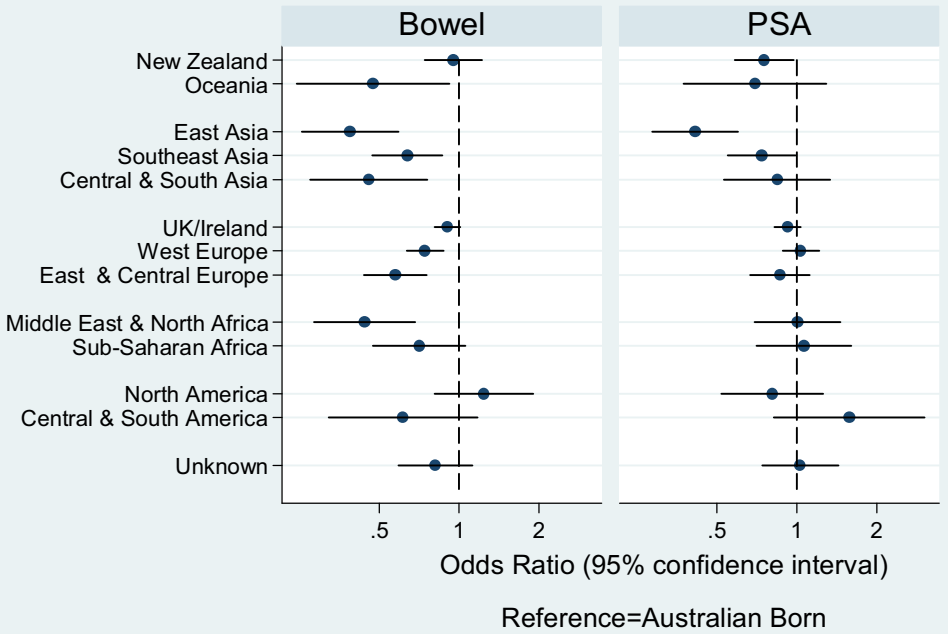

B

## Test Use Among Women

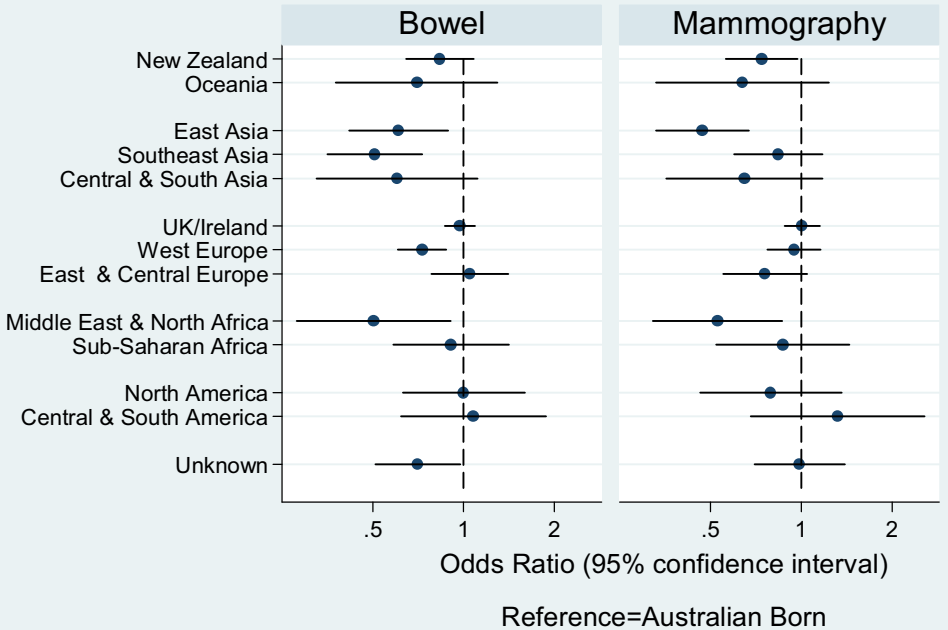

Supplement: MOESM2 [file 9503400]
